# Supplementary material
Source: PubMed Central journal article supplement (PMC6237238)
Supplement: jciinsight-3-122795-s079.pdf [file jciinsight-3-122795-s079.pdf]

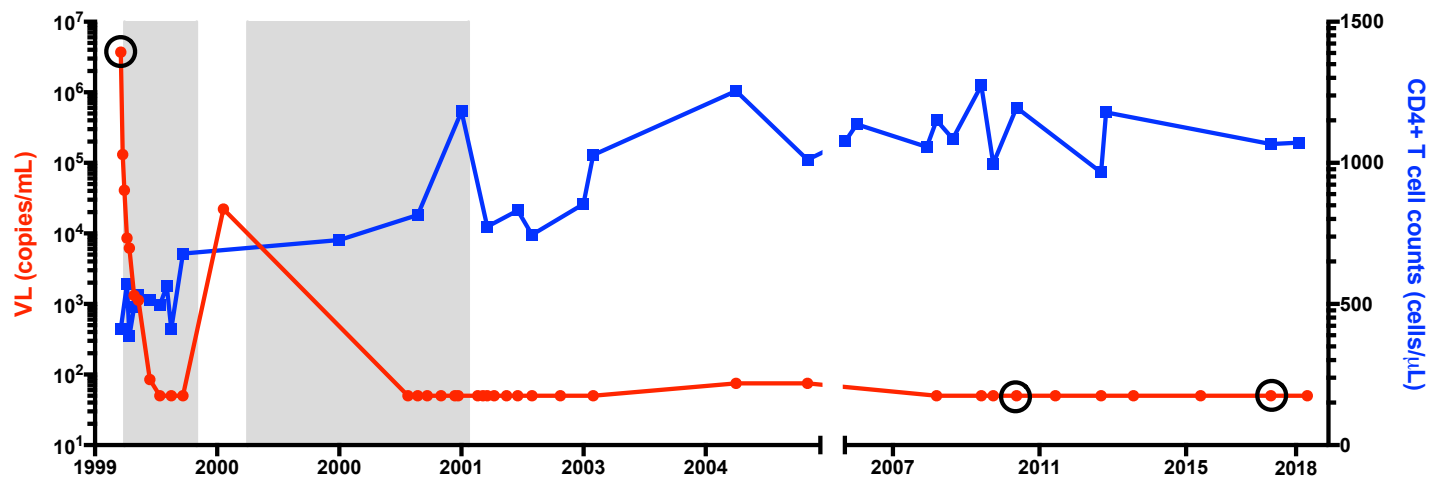

**Supplementary Figure 1. Clinical characteristics of Pt169 1999-2018**

Gray boxes indicate time when on ART. Black circles are timepoint in which virus was isolated from patient.

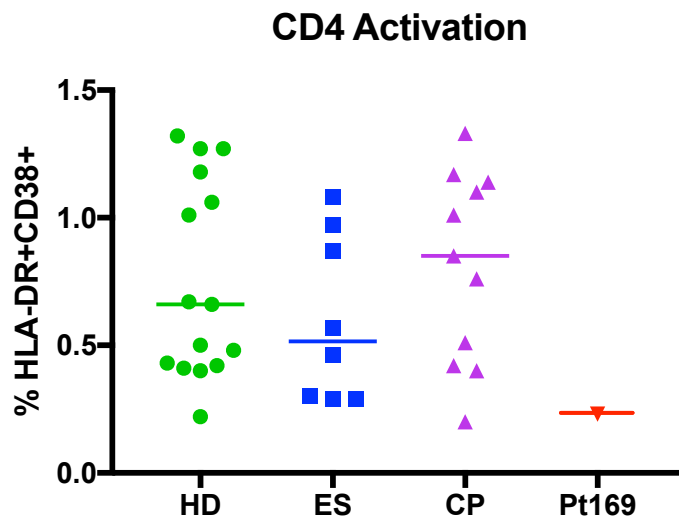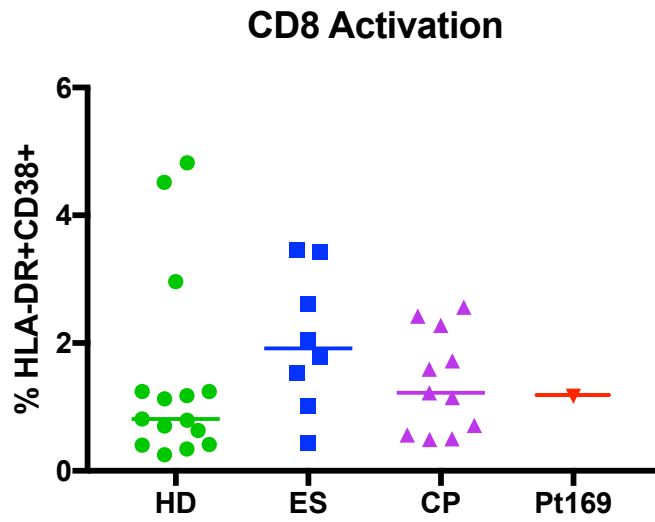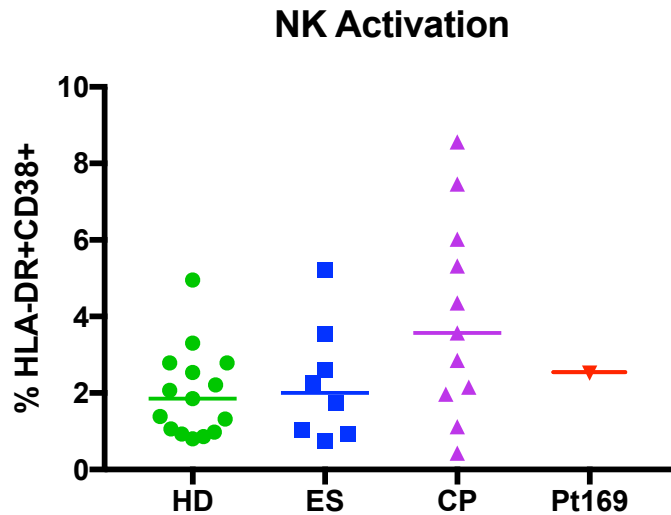

**Supplementary Figure 2**

Expression of activation markers on T cells and NK cells in healthy donors (HD), elite suppressors (ES), chronic progressors (CP) and Pt169

**Supplementary Table 1. Nucleotide changes in the sequences of replication competent isolates from Pt169 1999, 2010 and 2017**

| Replication Competent (RC) clones | # of near full length sequences | NT changes ( $\Delta$ ) compared to 1999                                                                                                                 | NT changes ( $\Delta$ ) compared to majority clone 2017                                                                                                  |
|-----------------------------------|---------------------------------|----------------------------------------------------------------------------------------------------------------------------------------------------------|----------------------------------------------------------------------------------------------------------------------------------------------------------|
| 2010-1A/1B                        | 2                               | 2 NT $\Delta$ LTR<br>18 NT <sub>del</sub> Gag<br>2 NT $\Delta$ Pol<br>1 NT $\Delta$ Vpr<br>2 NT $\Delta$ , 21 NT <sub>del</sub> Env<br>1 NT $\Delta$ Nef | 2 NT $\Delta$ LTR<br>18 NT <sub>del</sub> Gag<br>2 NT $\Delta$ Pol<br>1 NT $\Delta$ Vpr<br>2 NT $\Delta$ , 21 NT <sub>del</sub> Env<br>1 NT $\Delta$ Nef |
| 2010-2B                           | 1                               | 1 NT $\Delta$ Gag                                                                                                                                        | 1 NT $\Delta$ Nef<br>1 NT $\Delta$ Gag                                                                                                                   |
| 2017-A (majority clone)           | 9                               | 1 NT $\Delta$ Nef                                                                                                                                        | NA                                                                                                                                                       |
| 2017-B                            | 1                               | 2 NT $\Delta$ Nef                                                                                                                                        | 1 NT $\Delta$ Nef                                                                                                                                        |
| 2017-C                            | 1                               | 1 NT $\Delta$ Nef<br>1 NT $\Delta$ Env                                                                                                                   | 1 NT $\Delta$ Env                                                                                                                                        |
| 2017-D                            | 1                               | 1 NT $\Delta$ Nef<br>1 NT $\Delta$ Gag                                                                                                                   | 1 NT $\Delta$ Gag                                                                                                                                        |

**Supplementary Table 2. Nucleotide changes in the ES24 2017 clonal replication competent sequence compared to 2014**

| Replication Competent (RC) clones | # of near full length sequences | NT changes ( $\Delta$ ) compared to 2014 |
|-----------------------------------|---------------------------------|------------------------------------------|
| 2017                              | 7                               | 1 NT $\Delta$ Gag<br>1 NT $\Delta$ Env   |

**Supplementary Table 3. Integration Sites Pt169**

| Patient | CellType    | Position        | GeneID         | Detected | Abundance | Reads  |
|---------|-------------|-----------------|----------------|----------|-----------|--------|
| Pt169   | Tcells:CD4+ | chr11-66090842  | PACS1 *        | U3:U5    | 2         | 204920 |
| Pt169   | Tcells:CD4+ | chr11+118245719 | MPZL3 *        | U3       | 2         | 83918  |
| Pt169   | Tcells:CD4+ | chr3+197125050  | DLG1 *~        | U3       | 2         | 964    |
| Pt169   | Tcells:CD4+ | chr16+14219073  | MKL2 *         | U3:U5    | 1         | 103479 |
| Pt169   | Tcells:CD4+ | chr17+32726741  | MYO1D *        | U5       | 1         | 1780   |
| Pt169   | Tcells:CD4+ | chr16+1650101   | CRAMP1 *       | U5       | 1         | 1541   |
| Pt169   | Tcells:CD4+ | chr1-117498637  | MAN1A2 *       | U3       | 1         | 214    |
| Pt169   | Tcells:CD4+ | chr19-34200256  | LSM14A *       | U3       | 1         | 91     |
| Pt169   | Tcells:CD4+ | chr4-5727077    | EVC *          | U3       | 1         | 57     |
| Pt169   | Tcells:CD4+ | chr12+118311101 | TAOK3 *        | U3       | 1         | 53     |
| Pt169   | Tcells:CD4+ | chr15+58131256  | AQP9           | U3       | 1         | 36     |
| Pt169   | Tcells:CD4+ | chr3+171304517  | TNIK *         | U3       | 1         | 32     |
| Pt169   | Tcells:CD4+ | chr22+21848473  | MAPK1 *~       | U5       | 1         | 6      |
| Pt169   | Tcells:CD4+ | chr3-197155529  | DLG1 *~        | U5       | 1         | 2      |
| Pt169   | Tcells:CD4+ | chr4-49040251   | CWH43 *        | U3       | 1         | 2      |
| Pt169   | Tcells:CD4+ | chrY-6289171    | FAM197Y9       | U3       | 1         | 2      |
| Pt169   | Tcells:CD4+ | chr11-38128576  | LOC105376633   | U3       | 1         | 1      |
| Pt169   | Tcells:CD4+ | chr12-19713908  | AEBP2          | U3       | 1         | 1      |
| Pt169   | Tcells:CD4+ | chr12-850073    | WNK1 *         | U3       | 1         | 1      |
| Pt169   | Tcells:CD4+ | chr13-51510221  | MIR4703        | U3       | 1         | 1      |
| Pt169   | Tcells:CD4+ | chr14-24470812  | LOC101927045 * | U3       | 1         | 1      |
| Pt169   | Tcells:CD4+ | chr18+34336630  | NOL4           | U3       | 1         | 1      |
| Pt169   | Tcells:CD4+ | chr19+28053359  | LOC101927151   | U3       | 1         | 1      |
| Pt169   | Tcells:CD4+ | chr22+16480471  | CCT8L2         | U3       | 1         | 1      |
| Pt169   | Tcells:CD4+ | chr3-46992304   | NBEAL2 *       | U3       | 1         | 1      |
| Pt169   | Tcells:CD4+ | chr3-65214462   | MAG1           | U3       | 1         | 1      |
| Pt169   | Tcells:CD4+ | chr4-10286735   | ZNF518B        | U3       | 1         | 1      |
| Pt169   | Tcells:CD4+ | chr4+19733685   | SLIT2          | U3       | 1         | 1      |
| Pt169   | Tcells:CD4+ | chr6-117396395  | ROS1 *~        | U5       | 1         | 1      |
| Pt169   | Tcells:CD4+ | chr6-62578024   | KHDRBS2        | U3       | 1         | 1      |
| Pt169   | Tcells:CD4+ | chr7-102423034  | LOC100630923 * | U3       | 1         | 1      |
| Pt169   | Tcells:CD4+ | chr9+137975579  | CACNA1B *      | U3       | 1         | 1      |

**Supplementary Table 4. Integration Sites ES24**

| Patient | CellType    | Position        | GeneID      | Detected | Abundance | Reads |
|---------|-------------|-----------------|-------------|----------|-----------|-------|
| ES24    | Tcells:CD4+ | chr12+788438    | WNK1 *      | U3       | 11        | 50417 |
| ES24    | Tcells:CD4+ | chr19-56575835  | ZNF470 *    | U3:U5    | 7         | 22977 |
| ES24    | Tcells:CD4+ | chr1+111605702  | LINC01160 * | U3:U5    | 5         | 7456  |
| ES24    | Tcells:CD4+ | chrX+129586366  | OCRL *      | U3:U5    | 3         | 4653  |
| ES24    | Tcells:CD4+ | chr11+66088645  | PACS1 *     | U3:U5    | 2         | 9317  |
| ES24    | Tcells:CD4+ | chr21+46568571  | DIP2A *     | U5       | 2         | 9240  |
| ES24    | Tcells:CD4+ | chr1-67334888   | IL12RB2 *   | U3:U5    | 2         | 895   |
| ES24    | Tcells:CD4+ | chr7-100546895  | AGFG2 *     | U3       | 2         | 14    |
| ES24    | Tcells:CD4+ | chr1+243035757  | LINC01347   | U3:U5    | 2         | 9     |
| ES24    | Tcells:CD4+ | chr10-38469695  | LINC00999   | U5       | 2         | 2     |
| ES24    | Tcells:CD4+ | chr20-519598    | CSNK2A1 *~  | U3:U5    | 2         | 2     |
| ES24    | Tcells:CD4+ | chrY-24301096   | GOLGA2P3Y   | U5       | 2         | 2     |
| ES24    | Tcells:CD4+ | chr8-68301074   | C8orf34-AS1 | U3       | 1         | 13826 |
| ES24    | Tcells:CD4+ | chr19+9618298   | ZNF561 *    | U3       | 1         | 12728 |
| ES24    | Tcells:CD4+ | chr22-17218184  | ADA2 *      | U3       | 1         | 10702 |
| ES24    | Tcells:CD4+ | chr19+43759400  | SMG9        | U5       | 1         | 8164  |
| ES24    | Tcells:CD4+ | chrX+45182310   | CXorf36 *   | U3       | 1         | 7112  |
| ES24    | Tcells:CD4+ | chr6-90015830   | BACH2 *~    | U3       | 1         | 2312  |
| ES24    | Tcells:CD4+ | chrX-71540482   | OGT *       | U3       | 1         | 2181  |
| ES24    | Tcells:CD4+ | chr17+44469357  | GPATCH8 *   | U5       | 1         | 657   |
| ES24    | Tcells:CD4+ | chr1+150420900  | RPRD2 *     | U3       | 1         | 433   |
| ES24    | Tcells:CD4+ | chr19-1974779   | CSNK1G2 *   | U5       | 1         | 417   |
| ES24    | Tcells:CD4+ | chr11+63893432  | MARK2 *     | U5       | 1         | 388   |
| ES24    | Tcells:CD4+ | chr22+40106897  | TNRC6B *    | U5       | 1         | 170   |
| ES24    | Tcells:CD4+ | chr17-81878965  | ARHGDI A    | U3       | 1         | 44    |
| ES24    | Tcells:CD4+ | chr18+2949476   | LPIN2 *     | U5       | 1         | 33    |
| ES24    | Tcells:CD4+ | chr7-44411464   | NUDCD3 *    | U3       | 1         | 17    |
| ES24    | Tcells:CD4+ | chr10+126033432 | ADAM12 *~   | U3       | 1         | 10    |
| ES24    | Tcells:CD4+ | chr19-47153461  | SAE1 *      | U5       | 1         | 7     |
| ES24    | Tcells:CD4+ | chr20+47258233  | ZMYND8 *~   | U5       | 1         | 5     |
| ES24    | Tcells:CD4+ | chr6+128375     | LINC00266-3 | U3       | 1         | 4     |
| ES24    | Tcells:CD4+ | chr10-38406250  | SEPT7P9     | U5       | 1         | 2     |
| ES24    | Tcells:CD4+ | chr11+170382    | SCGB1C1     | U5       | 1         | 2     |
| ES24    | Tcells:CD4+ | chr2+86163183   | IMMT *      | U3       | 1         | 2     |
| ES24    | Tcells:CD4+ | chr19+12654658  | MAN2B1 *    | U5       | 1         | 1     |
| ES24    | Tcells:CD4+ | chr20-64306882  | LINC00266-1 | U3       | 1         | 1     |
| ES24    | Tcells:CD4+ | chr7+6334995    | FAM220A *   | U5       | 1         | 1     |
| ES24    | Tcells:CD4+ | chr8+188554     | RPL23AP53   | U5       | 1         | 1     |
| ES24    | Tcells:CD4+ | chrY+25369046   | GOLGA2P3Y   | U5       | 1         | 1     |

**Supplementary Table 5. Epitopes targeted in Gag and Nef by Pt169 CD8+ T cells**

| SFC per million | Gag AA# | Consensus sequence | AA Δ compared to                                                 |                            |
|-----------------|---------|--------------------|------------------------------------------------------------------|----------------------------|
|                 |         |                    | 2010 Pt169 sequences                                             | 2017 clonal Pt169 sequence |
| 270             | 9-23    | SGGELDRWEKIRLRP    |                                                                  |                            |
| 50              | 37-51   | ASRELERFAVNPGLL    |                                                                  |                            |
| 25              | 77-91   | SLYNTVATLYCVHQR    | V82I, R91N (3/3)                                                 | V82I, R91N                 |
| 40              | 241-255 | STLQEQIGWMTNPP     | N252S (3/3)                                                      | N252S                      |
| 35              | 265-279 | WIILGLNKIVRMYP     |                                                                  |                            |
| 510             | 353-364 | VGGPGHKARVLAEAM    | G357A (3/3)                                                      | G357A                      |
| <b>Nef AA#</b>  |         |                    |                                                                  |                            |
| 440             | 6-19    | WSKRSVVGWPTVRER    | R8S, V10I, T15A, V16I, R17G (2/3)<br>R8S, V10I, T15A, V16I (1/3) | R8S, V10I, T15A, V16I      |
| 40              | 12-26   | WPTVRERMRRAEPA     | T15A, V16I, R17G (2/3)<br>T15A, V16I (1/3)                       | T15A, V16I                 |
| 30              | 182-195 | MDDPEREVLEWKFDS    | R186K (3/3)                                                      | R186K                      |

**Supplementary Table 6. Epitopes targeted in Gag and Nef by ES24 CD8+ T cells**

| SFC per million | Gag AA # | Consensus sequence | AA Δ compared to               |                           |
|-----------------|----------|--------------------|--------------------------------|---------------------------|
|                 |          |                    | 2014 ES24 sequences            | 2017 clonal ES24 sequence |
| 382.5           | 24-39    | GKKKYKLVHIVWASR    |                                |                           |
| 447.5           | 93-107   | EVKDTKEALEKIEEE    | E93D (13/13)                   | E93D                      |
| 622.5           | 141-155  | QMVHQAISPRTLNAW    |                                |                           |
| 140             | 161-175  | EKAFSPEVPMFSAL     |                                |                           |
| 310             | 237-251  | AGTTSTLQEQIGWMT    |                                |                           |
| 60              | 269-283  | GLNKIVRMYSPTSIL    |                                |                           |
| 27.5            | 297-311  | VDRFYKTLRAEQASQ    |                                |                           |
| 82.5            | 333-347  | ILKALGPAATLEEMM    |                                |                           |
| 32.5            | 365-379  | EAMSQVTNSATIMMQ    | M378I (13/13)                  | M378I                     |
| 45              | 433-447  | FLGKIWPSHKGRPGN    |                                |                           |
| 40              | 453-467  | PEPTAPPEESFRFGE    |                                |                           |
| 25              | 483-497  | KELYPLASLRSLFGN    |                                |                           |
| <b>Nef AA#</b>  |          |                    |                                |                           |
| 35              | 65-79    | EVGFPVRPQVPLRPM    | R71T (1/12)<br>V74I (11/12)    | V74I                      |
| 107.5           | 81-95    | YKAAVDLSHFLKEKG    |                                |                           |
| 80              | 89-103   | HFLKEKGGLEGLIYS    |                                |                           |
| 47.5            | 113-127  | WVYHTQGYFPDWQNY    |                                |                           |
| 85              | 133-47   | IRYPLTFGWCFKLVP    | I133T (12/12)<br>F139Y (11/12) | I133T, F139Y              |

Note: Red indicates known B57 epitope
